# Supplementary material
Source: MDPI journal article supplement (https://www.mdpi.com/1424-8247/14/10/1009)
Supplement: s1 [file s1]

**Table S1.** Compounds tentatively identified in the MeOH extract from carevid.

| No  | Rt (min) | Tentative Identity                | Pseudomolecular Ion ( <i>m/z</i> ) | MS/MS Ions                                                    | Confidence Level |
|-----|----------|-----------------------------------|------------------------------------|---------------------------------------------------------------|------------------|
| 1   | 1.73     | Sucrose                           | [M - H] <sup>-</sup> 341.1086      | 341 → 281, 179bp, 161, 143, 131, 119, 113, 101                | 2                |
| 2   | 2.55     | Citric acid                       | [M - H] <sup>-</sup> 191.01955     | 191 → 173, 111bp                                              | 2                |
| 3   | 5.33     | Catechin <i>O</i> -hexoside       | [M - H] <sup>-</sup> 451.12445     | 451 → 289bp → 271, 245bp, 231, 205, 179, 125                  | 2                |
| 4   | 6.39     | Epicatechin <i>O</i> -hexoside    | [M - H] <sup>-</sup> 451.12424     | 451 → 289bp → 271, 245bp, 231, 205, 179, 125                  | 2                |
| 5   | 7.10     | Procyanidin B                     | [M - H] <sup>-</sup> 577.13464     | 577 → 559, 451, 425bp, 407, 299, 289, 245                     | 3                |
| 6   | 7.57     | Mangiferin isomer 1               | [M - H] <sup>-</sup> 421.07727     | 421 → 403, 331, 301bp                                         | 2                |
| 7   | 8.14     | Mangiferin isomer 2               | [M - H] <sup>-</sup> 421.07703     | 421 → 403, 331, 301bp                                         | 2                |
| 8   | 8.82     | 4- <i>O</i> -Coumaroulquinic acid | [M - H] <sup>-</sup> 337.09244     | 337 → 173bp → 155, 137, 127, 111, 93bp, 83, 71                | 2                |
| 9   | 10.87    | Ellagic acid <i>O</i> -pentoside  | [M - H] <sup>-</sup> 433.04092     | 433 → 301bp → 284, 273, 257bp, 245, 229, 213, 201, 185        | 2                |
| 10a | 11.91    | Hesperetin <i>O</i> -rutinoside   | [M - H] <sup>-</sup> 609.18188     | 609 → 301bp → 286bp, 283, 257, 242, 199, 125                  | 2                |
| 10b | 11.91    | Ellagic acid                      | [M - H] <sup>-</sup> 300.99860     | 301 → 284, 273, 257bp, 245, 229, 213, 201, 185                | 2                |
| 11  | 12.84    | Oleuropein                        | [M - H] <sup>-</sup> 539.17657     | 539 → 403, 377bp, 345, 307, 275                               | 2                |
| 12  | 15.55    | Tremulacin                        | [M - H] <sup>-</sup> 527.15576     | 527 → 405bp → 377, 299, 219, 155, 137, 123                    | 2                |
| 13  | 6.07     | Magnoflorine                      | [M + H] <sup>+</sup> 342.17081     | 342 → 311, 297bp, 279, 265                                    | 2                |
| 14  | 15.93    | Crotopoxide                       | [M + H] <sup>+</sup> 363.10822     | 363 → 321, 303, 261, 243, 215, 199, 181, 153, 139, 121, 105bp | 2                |
| 15  | 16.82    | Unidentified alkaloid             | [M + H] <sup>+</sup> 248.12866     | 248 → 175bp → 145bp                                           | 4                |
| 16  | 20.65    | Pellitorine                       | [M + H] <sup>+</sup> 224.20135     | 224 → 168, 151bp, 133, 123, 109, 95, 81, 69                   | 2                |
| 17  | 22.94    | Dammarane tetrol                  | [M + H] <sup>+</sup> 443.38910     | 479 → 461bp, 443 → 425bp, 407, 357, 303                       | x                |

Confidence level (Metabolomics Standard Initiative): 1 (high confidence) based upon co-characterization with a reference standard; 2 (medium) based on UV, HRMS and MS/MS comparisons with data in the literature; 3 (low) chemical class suggested by accurate MS and MS/MS; 4 unknown compound; bp: base peak
